# Supplementary material for: New thorium–bismuth oxide solid solutions with oxygen vacancy induced tunable ferromagnetism
Source: Royal Society of Chemistry journal article supplement (doi:10.1039/c7tc01450c), 2017-01-01
Supplement: c7tc01450c1.pdf [file c7tc01450c1.pdf]

## Supplementary information

### **New Thorium-Bismuth Oxide Solid solutions with Oxygen Vacancy induced tunable ferromagnetism**

Buddhadev Kanrar<sup>1,6</sup>, Nimai Pathak<sup>2,6</sup>, Chandrani Nayak<sup>3,6</sup>, Champa Lal Prajapat<sup>4</sup>, Ramakant Mahadeo Kadam<sup>2,6</sup>, Shambhu Nath Jha<sup>3</sup>, Dibyendu Bhattacharyya<sup>3,6</sup>, G. Ravikumar<sup>5,6</sup> and Nand Lal Misra<sup>1,6</sup>

1: Fuel Chemistry Division, 2: Radiochemistry Division, 3. Atomic and Molecular Physics Division, 4: Technical Physics Division, 5. Scientific Information Resource Division, Bhabha Atomic Research Centre, Mumbai 400085, India

6: Homi Bhabha National Institute, Anushakti Nagar, Mumbai 400094, India

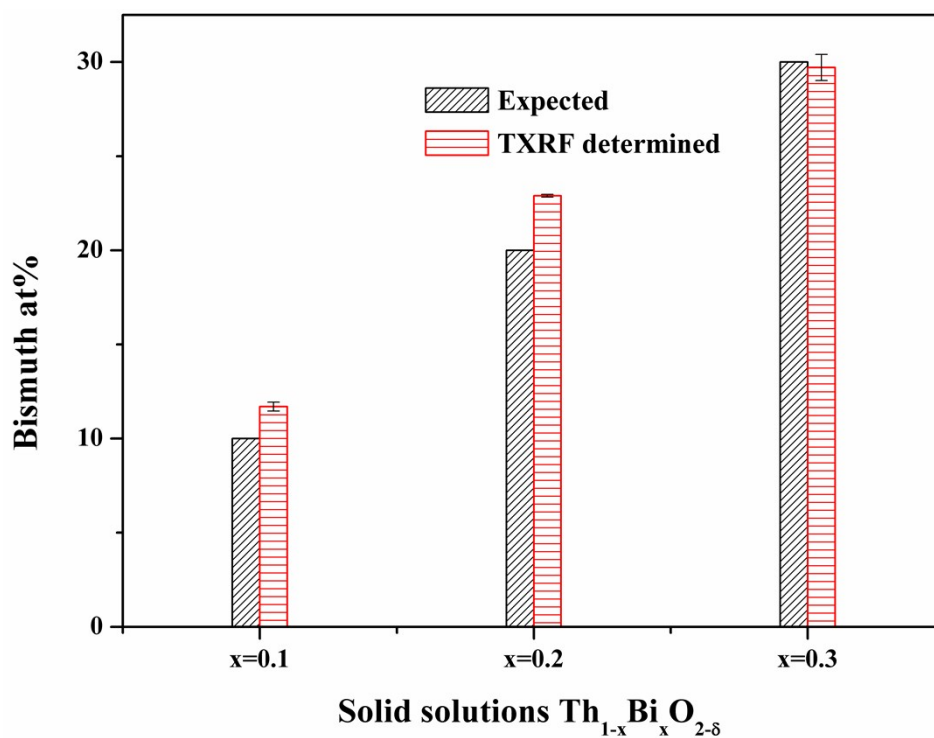

Figure S1: Comparison of TXRF determined Bi at% and expected (on the basis of preparation) Bi at% in  $\text{Th}_{1-x}\text{Bi}_x\text{O}_{2-\delta}$  solid solutions

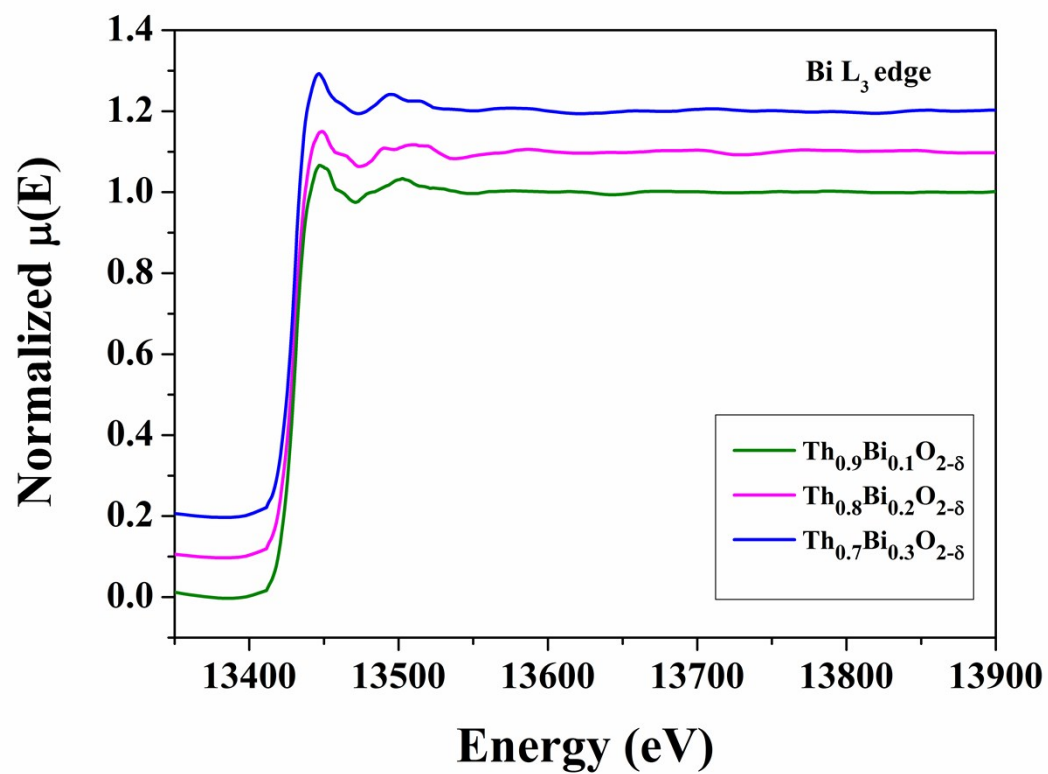

Figure S2: EXAFS spectra of the  $\text{Th}_{1-x}\text{Bi}_x\text{O}_{2-\delta}$  solid solutions for  $x = 0.1, 0.2$ , and  $0.3$  measured at Bi  $L_3$  edge

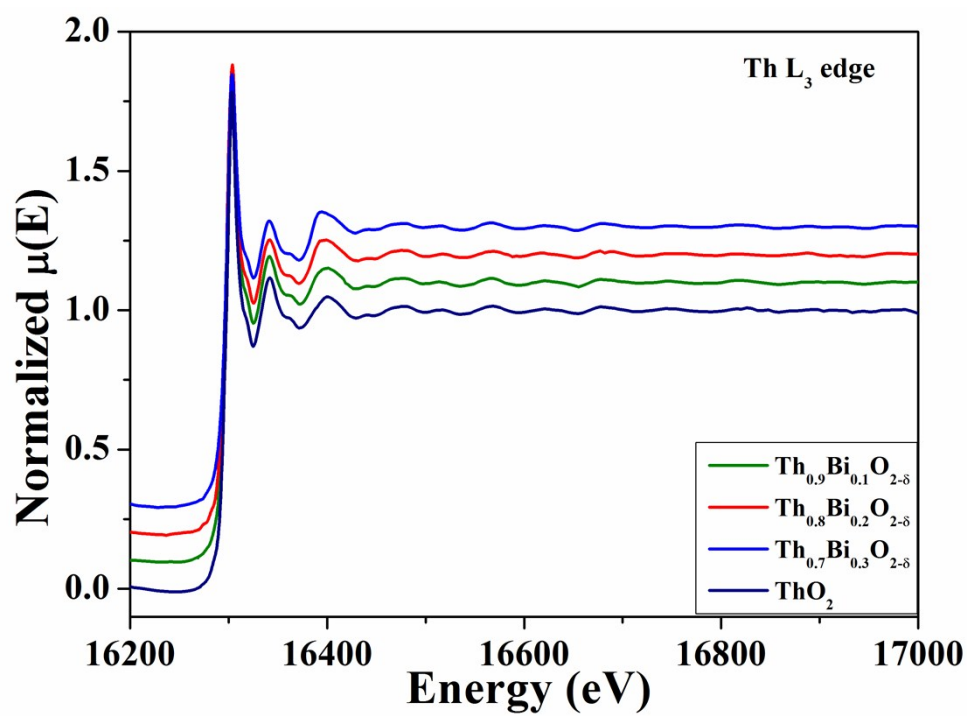

Figure S3: Experimental EXAFS ( $\mu(E)$ ) versus  $E$  spectra of the  $\text{Th}_{1-x}\text{Bi}_x\text{O}_{2-\delta}$  solid solutions for  $x = 0, 0.1, 0.2, 0.3$  measured at Th  $L_3$  edge

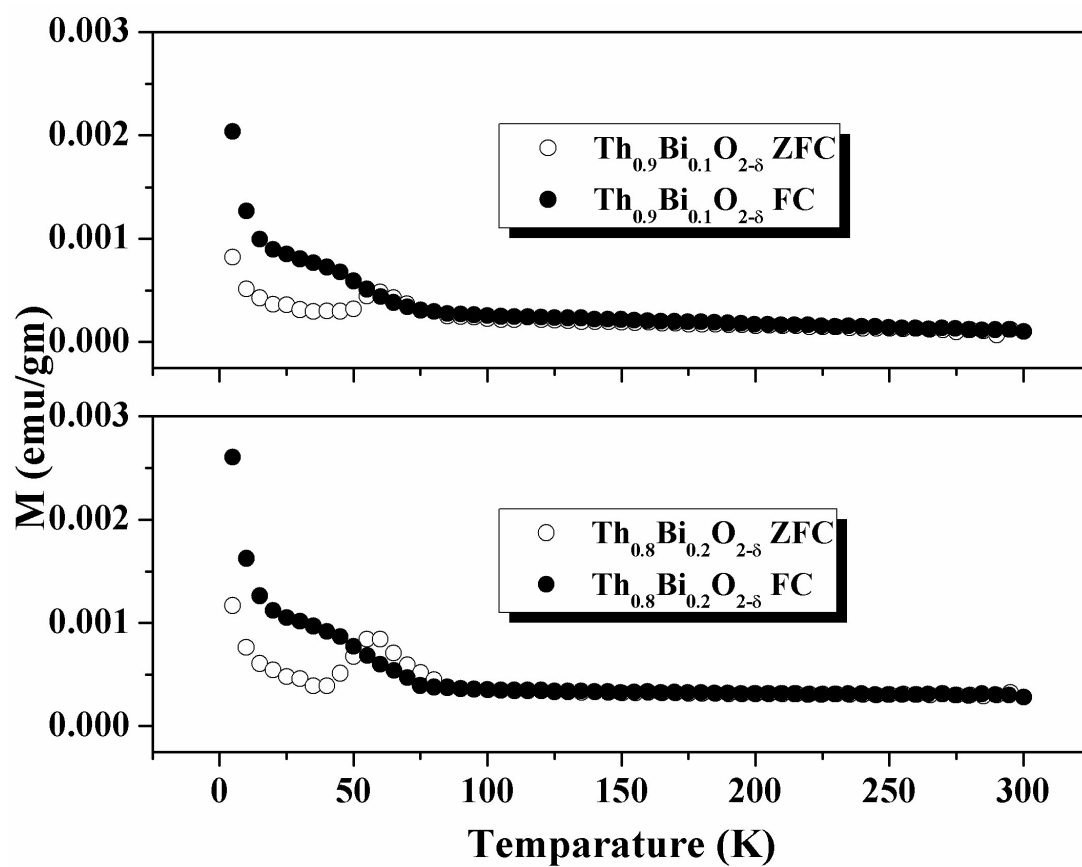

Figure S4: Magnetization ( $M$ ) vs. Temperature ( $T$ ) curve under FC and ZFC measurement for  $\text{Th}_{1-x}\text{Bi}_x\text{O}_{2-\delta}$  for  $x=0.1$  and  $0.2$

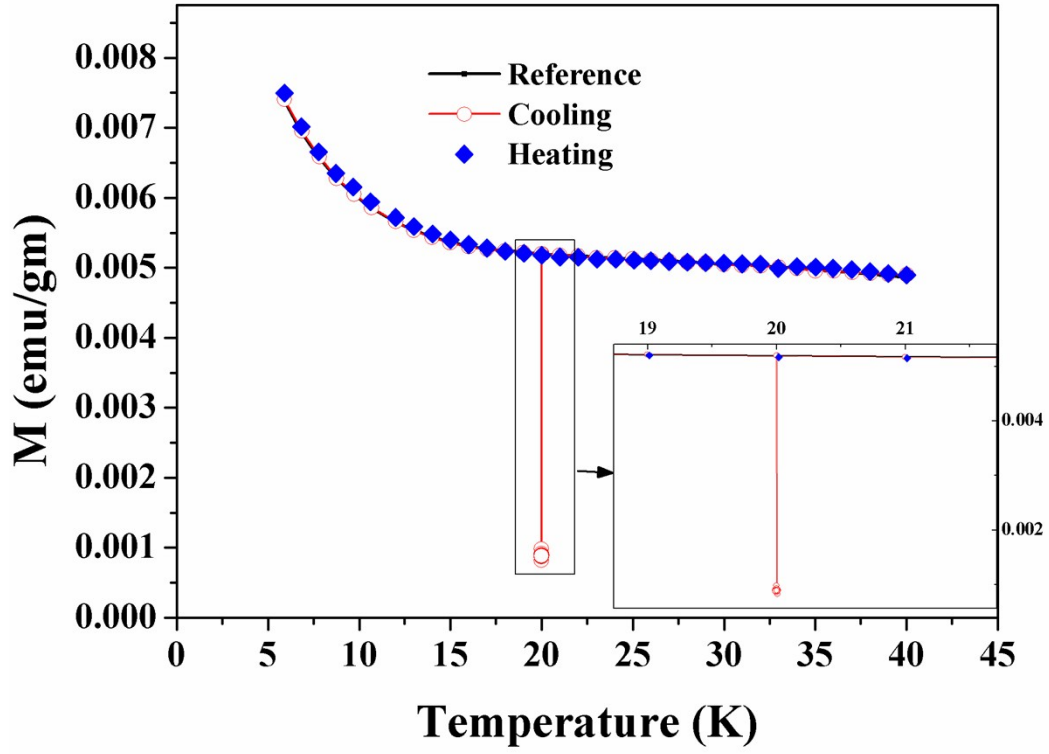

Figure S5:  $M(T)$  plot for memory effect study in dc magnetization measurement on  $\text{Th}_{0.7}\text{Bi}_{0.3}\text{O}_{2-\delta}$ . Solid line is measured data during heating (reference) at a constant heating rate of 2 K/min after FC in presence of 1000 oe field. Open circles are measured data during cooling at same cooling rate but with cooling stop at 20 K for 2 hours. Solid squares are measured data during heating. Inset figure is the enlarged view of the data near relaxation measurement

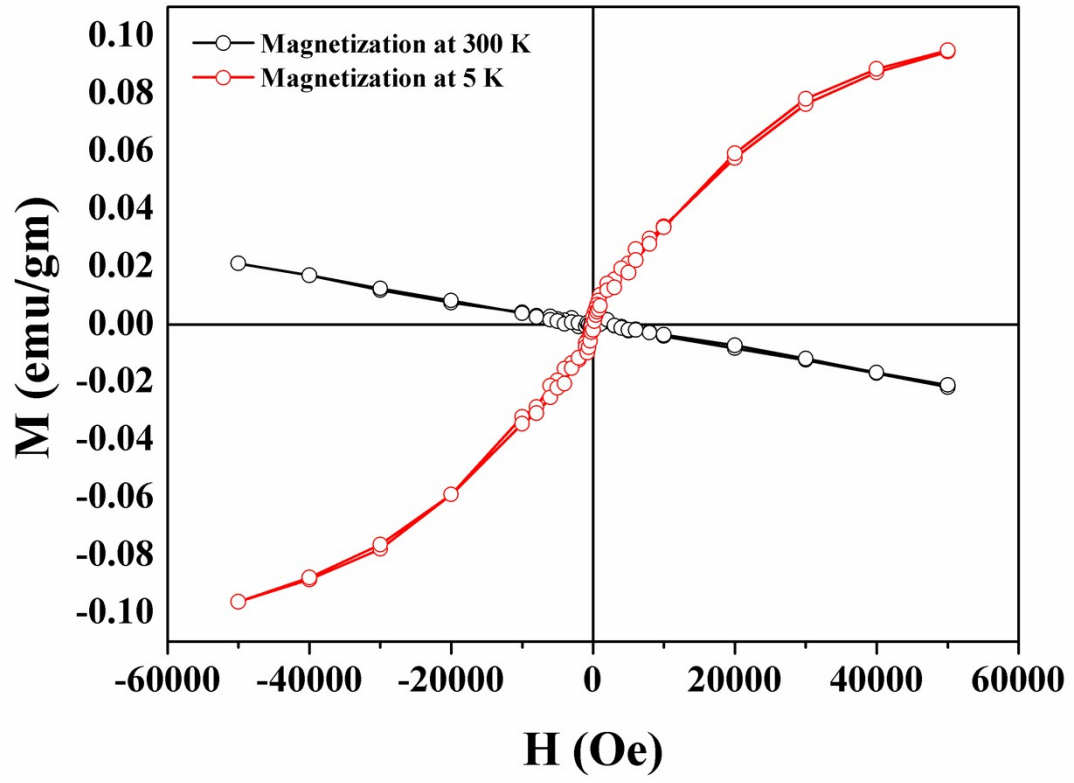

Figure S6: A field dependent dc magnetization measurement at 5K and 300K for  $Th_{0.7}Bi_{0.3}O_{2-\delta}$ .

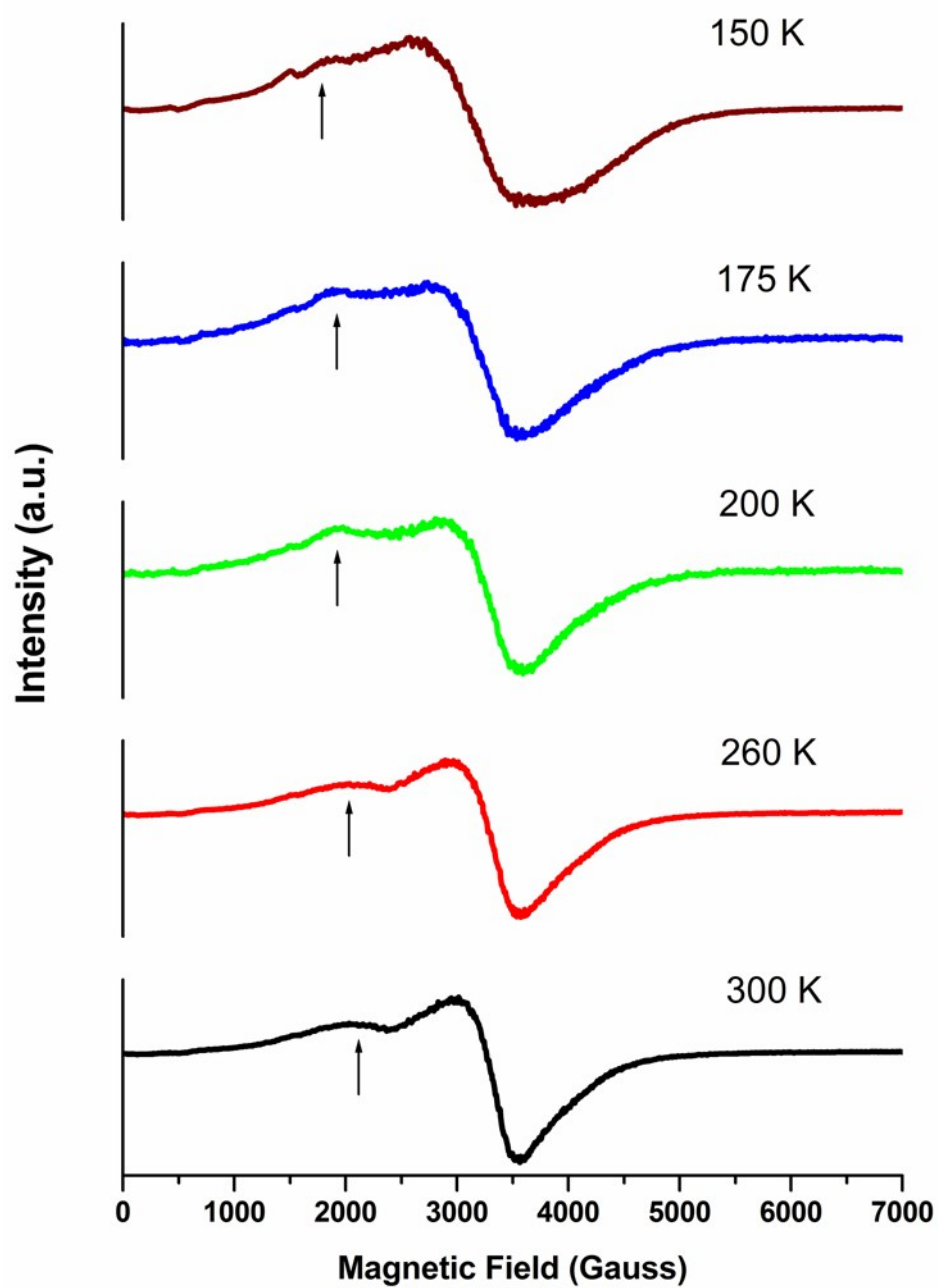

**Figure S7:** Temperature dependent EPR spectra of  $Th_{0.9}Bi_{0.1}O_{2-\delta}$  solid solutions (arrow indicate the FMR signal appearing as we are going to lower temperature)

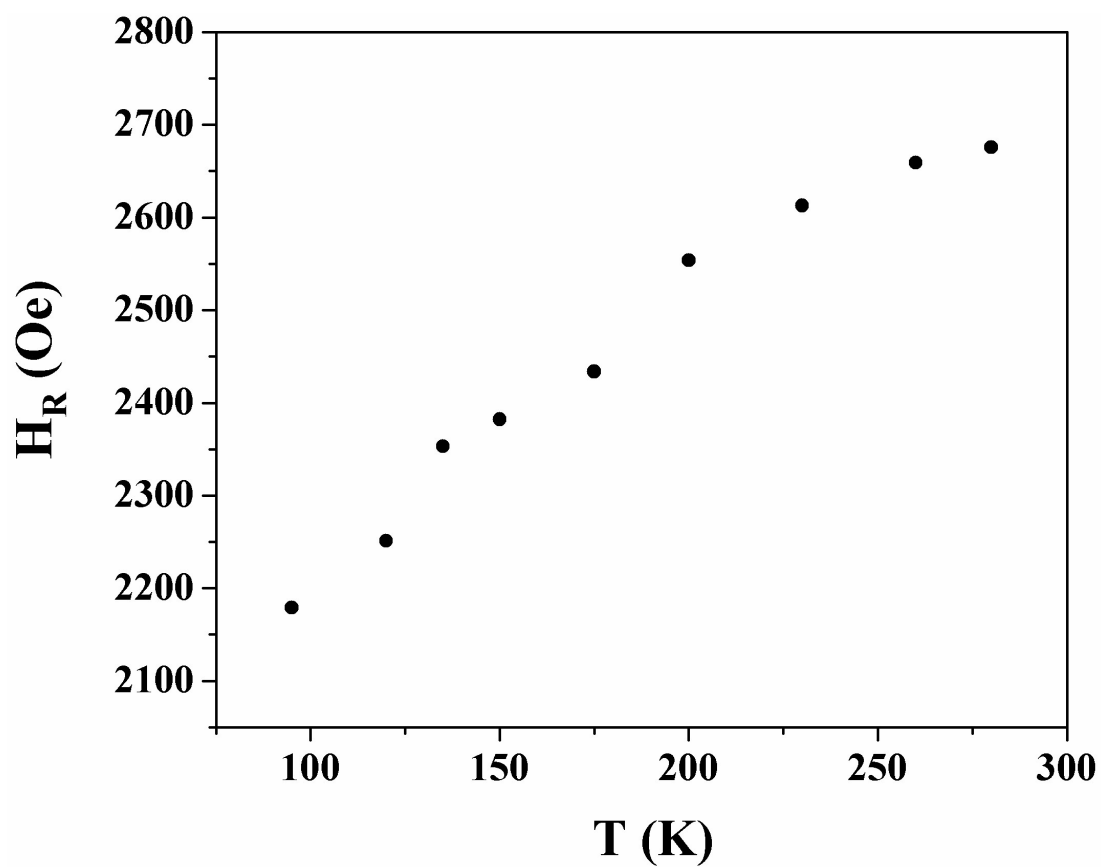

Figure S8: Temperature dependencies of resonance field,  $H_R$  of the FMR signal  $Th_{0.7}Bi_{0.3}O_{2-\delta}$  solid solutions.

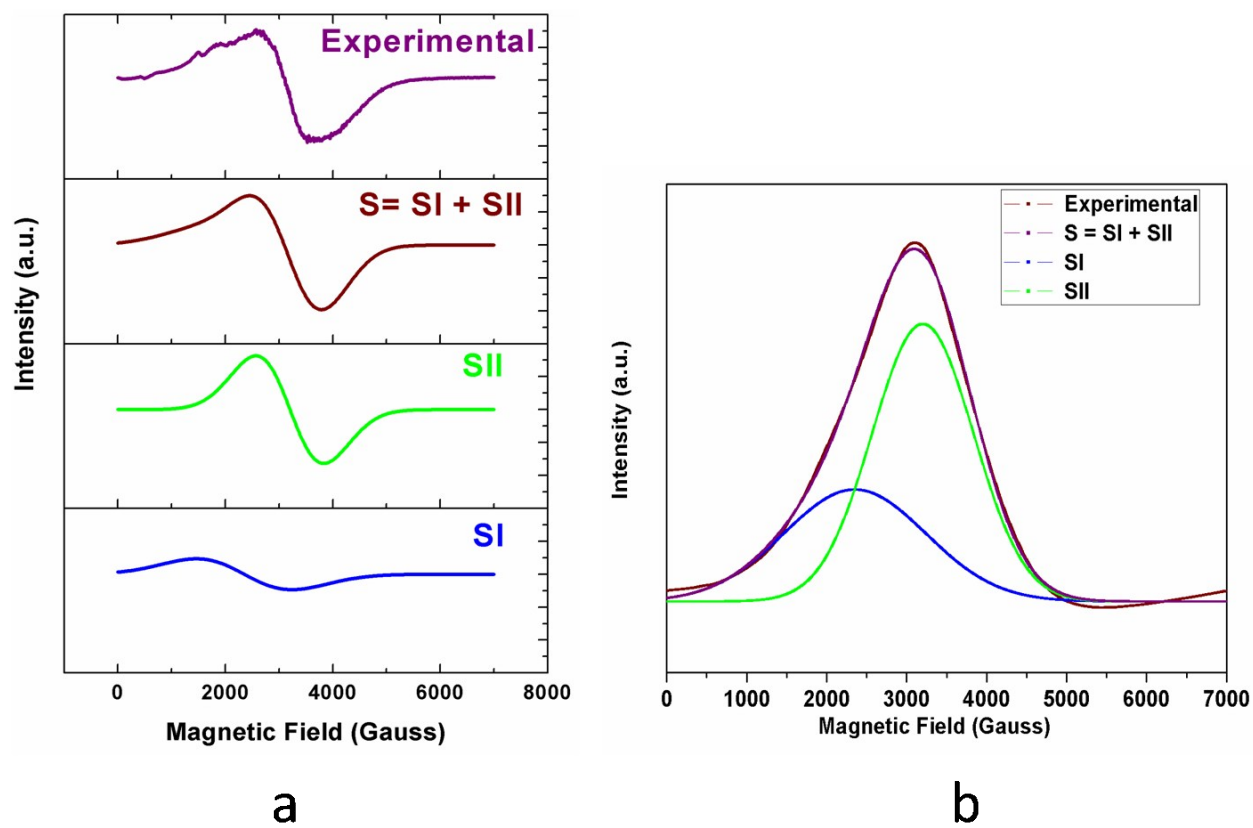

**Figure S9:** Gaussian fitted EPR spectrum of  $Th_{0.9}Bi_{0.1}O_{2-\delta}$  solid solutions at 150 K ; (a) Derivative spectra (b) Integrated spectra

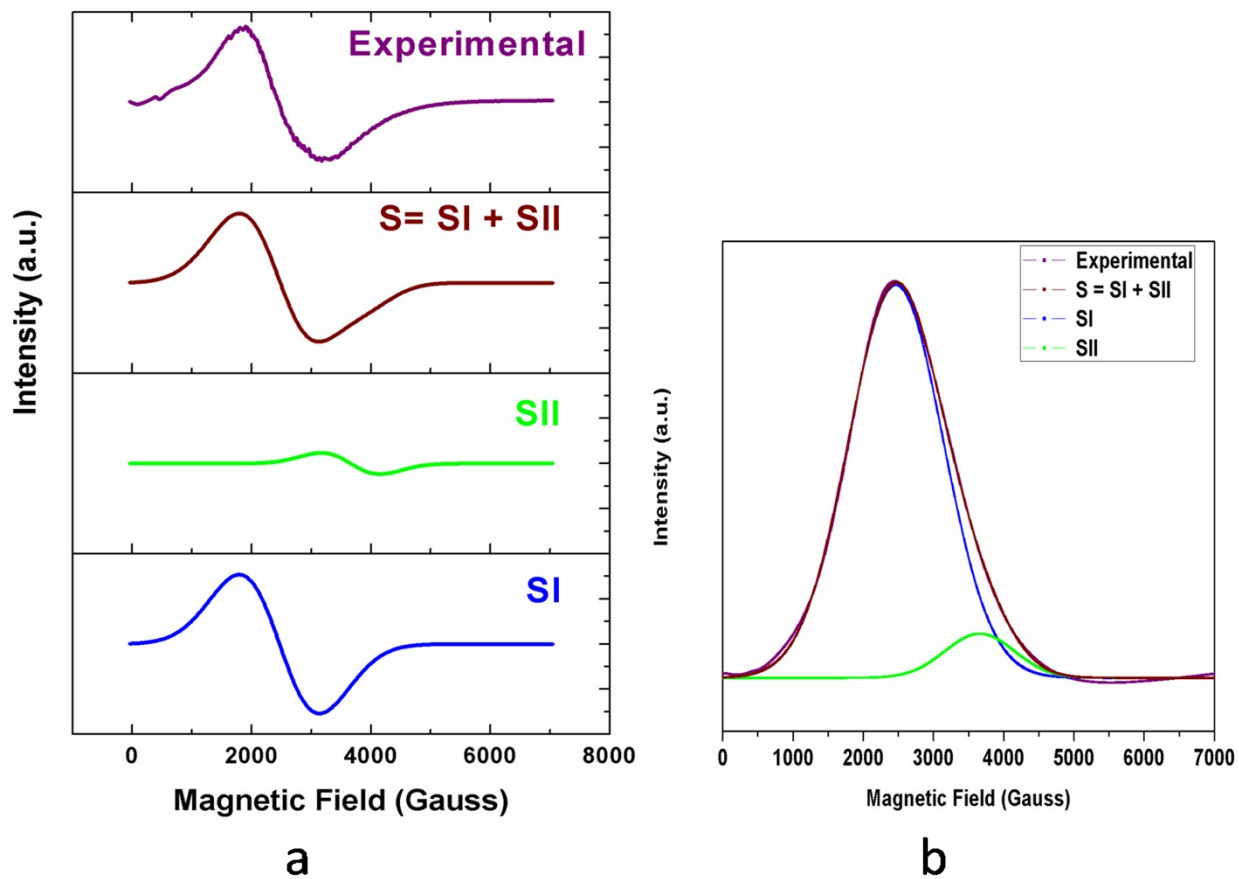

**Figure S10:** Gaussian fitted EPR spectrum of  $Th_{0.7}Bi_{0.3}O_{2-\delta}$  solid solutions at 150 K ; (a) Derivative spectra (b) Integrated spectra

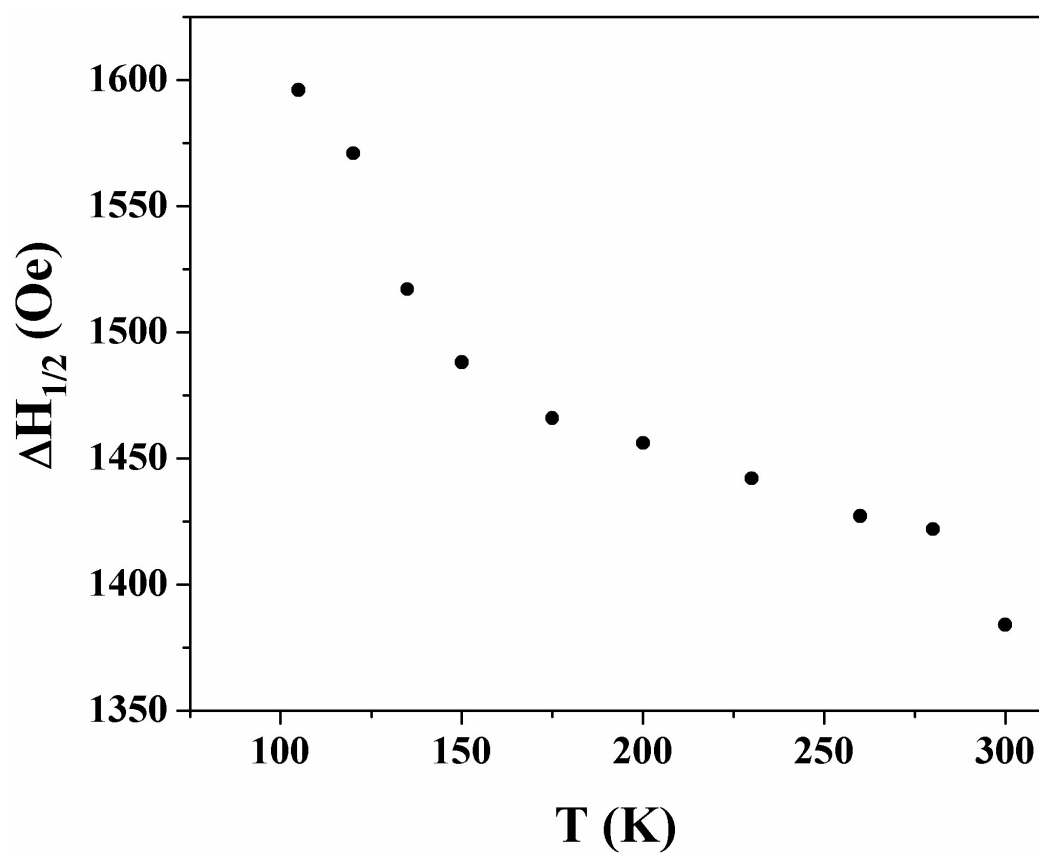

Figure S11: Temperature dependencies of line width,  $\Delta H_{1/2}$ , of the FMR signal of  $Th_{0.7}Bi_{0.3}O_{2-\delta}$  solid solutions.

Table-S1:

Comparison of expected and XPS determined oxygen at% in  $\text{Th}_{1-x}\text{Bi}_x\text{O}_{2-\delta}$ 

| Solid Solutions                                     | Expected O at% * | XPS determined O at% | % deviation of XPS value from the expected value |
|-----------------------------------------------------|------------------|----------------------|--------------------------------------------------|
| $\text{Th}_{0.9}\text{Bi}_{0.1}\text{O}_{2-\delta}$ | 66.1             | 67.6                 | -2.2                                             |
| $\text{Th}_{0.8}\text{Bi}_{0.2}\text{O}_{2-\delta}$ | 65.5             | 63.1                 | 3.9                                              |
| $\text{Th}_{0.7}\text{Bi}_{0.3}\text{O}_{2-\delta}$ | 64.9             | 62.4                 | 3.9                                              |

\*: Calculated on the basis of preparation
